# Supplementary material for: Quality of Life among Hungarian Adolescents with Cancer: The Hungarian Adaptation of the Minneapolis-Manchester Quality of Life Instrument - Adolescent Form (MMQL-AF)
Source: Research Square preprint supplement (doi:10.21203/rs.3.rs-7593854/v1), 2025-09-29
Supplement: Supplementary file 1 [file 101fd162eb3374b833bdab81.xlsx]

## Sheet: Supplementary_5_TST
	Finished treatment in 5 years (n=25)	Finished treatment longer than 5 years (n=21)	p-value
	Mean (SD)
Total score	3.65 (0.61)	3.53 (0.71)	0.5
Physical functioning	3.07 (0.77)	2.94 (0.82)	0.6
Psychological functioning	3.88 (0.72)	3.71 (0.82)	0.6
Social functioning	3.73 (0.82)	3.68 (0.81)	0.7
Cognitive functioning	3.62 (0.88)	3.51 (1.24)	>0.9
Body Image	3.96 (0.73)	3.75 (0.91)	0.5
Outlook on life	3.81 (0.93)	3.73 (1.01)	0.8
Intimate relations	3.73 (0.92)	3.71 (1.03)	>0.9
Supplementary material 7 - Comparison of MMQL-AF Scores Between Short-Term and Long-Term Cancer Survivors
Table Legend:
Analysis of quality of life outcomes in childhood cancer survivors based on time since treatment completion.
Participants were grouped as short-term (≤5 years) and long-term (>5 years) survivors.
No significant differences were found between the groups across any MMQL-AF domains, indicating that duration since treatment did not significantly impact perceived quality of life.
