# Supplementary material for: Quality of Life among Hungarian Adolescents with Cancer: The Hungarian Adaptation of the Minneapolis-Manchester Quality of Life Instrument - Adolescent Form (MMQL-AF)
Source: Research Square preprint supplement (doi:10.21203/rs.3.rs-7593854/v1), 2025-09-29
Supplement: Supplementary file 2 [file 370b9fab126e65e125aea894.xlsx]

## Sheet: Supplementary_1_PedsQL_groups
	Group A	Group O	Group C	A vs. C (p)	O vs. C (p)	A vs. O (p)
Total score	2.98 (2.78, 3.42)	2.93 (2.61, 3.30)	3.26 (3.04, 3.47)	0.033	0.009	0.4
Physical health	3.06 (2.28, 3.50)	3.00 (2.50, 3.50)	3.44 (3.25, 3.62)	0.041	0.004	0.7
Feeling	3.20 (2.80, 3.60)	3.20 (2.85, 3.60)	3.20 (2.60, 3.60)	0.8	0.7	>0.9
Social relations	3.00 (2.65, 3.40)	3.00 (2.60, 3.20)	3.00 (2.60, 3.20)	0.8	0.5	0.4
School	3.20 (2.80, 3.55)	3.00 (1.65, 3.55)	3.60 (3.00, 3.80)	0.027	0.005	0.2
Supplementary material 3 - PedsQL results and comparison of the three examined groups
Table Legend:
Comparison of PedsQL 4.0 SF scores between children with cancer and healthy controls.
Healthy participants reported significantly higher scores in the total score, Physical Functioning, and School Functioning domains, indicating better overall health-related quality of life in these areas.
