# Supplementary material for: Quality of Life among Hungarian Adolescents with Cancer: The Hungarian Adaptation of the Minneapolis-Manchester Quality of Life Instrument - Adolescent Form (MMQL-AF)
Source: Research Square preprint supplement (doi:10.21203/rs.3.rs-7593854/v1), 2025-09-29
Supplement: Supplementary file 3 [file 9097b5895b5c4d3d65a57cba.xlsx]

## Sheet: Munkalap1
Outlook on life	difference	CI lower bound	CI upper bound	p-value
CNS-BST	-0.27	-0.97	0.44	0.832
NF1-BST	0.17	-0.61	0.95	0.975
Other-BST	0.55	-0.39	1.49	0.486
TC-BST	0.42	-0.38	45678	0.598
NF1-CNS	0.43	-0.19	45662	0.303
Other-CNS	0.81	0.00	1.63	0.049
TC-CNS	0.68	0.04	1.33	0.033
Other-NF1	0.38	-0.50	2025-01-26	0.745
TC-NF1	0.25	-0.48	0.97	0.874
TC-Other	-0.13	-1.03	0.76	0.994
Outlook on life	difference	CI lower bound	CI upper bound	p-value
CNS-BST	-0.27	-0.97	0.44	0.832
NF1-BST	0.17	-0.61	0.95	0.975
Other-BST	0.55	-0.39	1.49	0.486
TC-BST	0.42	-0.38	45678	0.598
NF1-CNS	0.43	-0.19	45662	0.303
Other-CNS	0.81	0.00	1.63	0.049
TC-CNS	0.68	0.04	1.33	0.033
Other-NF1	0.38	-0.50	2025-01-26	0.745
TC-NF1	0.25	-0.48	0.97	0.874
TC-Other	-0.13	-1.03	0.76	0.994
Outlook on life	difference	CI lower bound	CI upper bound	p-value
CNS-BST	-0.27	-0.97	0.44	0.832
NF1-BST	0.17	-0.61	0.95	0.975
Other-BST	0.55	-0.39	1.49	0.486
TC-BST	0.42	-0.38	45678	0.598
NF1-CNS	0.43	-0.19	45662	0.303
Other-CNS	0.81	0.00	1.63	0.049
TC-CNS	0.68	0.04	1.33	0.033
Other-NF1	0.38	-0.50	2025-01-26	0.745
TC-NF1	0.25	-0.48	0.97	0.874
TC-Other	-0.13	-1.03	0.76	0.994
Supplementary material 6 - Paired Comparisons of MMQL-AF Scores Across Cancer Diagnostic Groups
Table Legend:
Supplementary analysis of quality of life scores (MMQL-AF) among different cancer diagnostic groups.
Significant pairwise differences were observed in total score, Outlook on Life, and Social Functioning domains,
with lower scores in patients with bone and soft tissue tumors or CNS tumors compared to other groups.
