# Supplementary material for: Quality of Life among Hungarian Adolescents with Cancer: The Hungarian Adaptation of the Minneapolis-Manchester Quality of Life Instrument - Adolescent Form (MMQL-AF)
Source: Research Square preprint supplement (doi:10.21203/rs.3.rs-7593854/v1), 2025-09-29
Supplement: Supplementary file 4 [file a7327264d97fa1806fa7f4a2.xlsx]

## Sheet: Supplementary_2_Ages
	Children under 16 years (n=77)	Children 16 years or older (n=61)	p-value
	Mean (SD)
Total score	3.71 (0.51)	3.59 (0.56)	0.2
Physical functioning	3.26 (0.70)	2.98 (0.65)	0.019
Psychological functioning	3.89 (0.60)	3.68 (0.75)	0.12
Social functioning	3.87 (0.75)	3.84 (0.74)	0.8
Cognitive functioning	3.76 (0.80)	3.66 (0.91)	0.7
Body Image	3.82 (0.78)	3.87 (0.70)	0.8
Outlook on life	3.86 (0.96)	3.69 (0.94)	0.3
Intimate relations	3.69 (0.91)	3.68 (0.94)	>0.9
Supplementary material 4 - Comparison of MMQL-AF Scores Between Age Groups (13–16 Years vs. >16 Years)
Table Legend:
Analysis of MMQL-AF scores by age group (13–16 years vs. >16 years) to assess the influence of age on quality of life.
No significant differences were found between the groups across any questionnaire domains, suggesting age did not affect perceived quality of life in this adolescent population.
