# Supplementary material for: Quality of Life among Hungarian Adolescents with Cancer: The Hungarian Adaptation of the Minneapolis-Manchester Quality of Life Instrument - Adolescent Form (MMQL-AF)
Source: Research Square preprint supplement (doi:10.21203/rs.3.rs-7593854/v1), 2025-09-29
Supplement: Supplementary file 5 [file c7810a7f1069672e8f16149d.xlsx]

## Sheet: Supplementary_3_parentalED
	Mothers			Fathers
	Not graduated	Graduated	p-value	Not graduanted	Graduated	p-value
	Mean (SD)			Mean (SD)
Total score	3.67 (0.52)	3.66 (0.55)	0.8	3.66 (0.57)	3.66 (0.50)	0.9
Physical functioning	3.12 (0.73)	3.12 (0.67)	0.8	3.11 (0.77)	3.16 (0.63)	0.6
Psychological functioning	3.89 (0.63)	3.72 (0.71)	0.3	3.83 (0.70)	3.77 (0.67)	0.6
Social functioning	3.84 (0.84)	3.87 (0.67)	>0.9	3.90 (0.84)	3.82 (0.66)	0.3
Cognitive functioning	3.65 (0.93)	3.77 (0.77)	0.5	3.66 (0.92)	3.76 (0.79)	0.6
Body Image	3.80 (0.80)	3.88 (0.70)	0.5	3.80 (0.85)	3.88 (0.65)	0.7
Outlook on life	3.82 (0.88)	3.76 (1.01)	>0.9	3.82 (0.96)	3.76 (0.95)	0.7
Intimate relations	3.76 (0.97)	3.63 (0.87)	0.3	3.70 (1.05)	3.68 (0.80)	0.5
Supplementary material 5 - Impact of Parental Education Level on MMQL-AF Quality of Life Scores
Table Legend:
Analysis of MMQL-AF scores based on parental education level.
No significant differences were found in adolescents’ reported quality of life across varying education levels of mothers or fathers,
suggesting parental education did not significantly influence perceived quality of life outcomes.
