# Supplementary material for: Quality of Life among Hungarian Adolescents with Cancer: The Hungarian Adaptation of the Minneapolis-Manchester Quality of Life Instrument - Adolescent Form (MMQL-AF)
Source: Research Square preprint supplement (doi:10.21203/rs.3.rs-7593854/v1), 2025-09-29
Supplement: Supplementary file 6 [file c78c4a99368d33b53b5035d0.xlsx]

## Sheet: Table_4_Correlation bw MvP
MMQL questionnaire	PedsQL 4.0 SF questionnaire
	Total score	Physical functioning	Emotional functioning	Social functioning	School functioning
Total score	0.84	0.58	0.65	0.59	0.56
Physical functioning	0.71	0.76	0.4	0.35	0.31
Psychological functioning	0.65	0.43	0.8	0.46	0.26
Social functioning	0.61	0.32	0.44	0.85	0.32
Cognitive functioning	0.61	0.34	0.27	0.33	0.85
Body Image	0.37	0.21	0.39	0.19	0.25
Outlook on life	0.47	0.36	0.43	0.33	0.25
Intimate relations	0.48	0.26	0.39	0.51	0.29
Supplementary material 2 - Spearman’s correlation coefficients between the Hungarian version of the MMQL-AF and the PedsQL 4.0 SF questionnaires. p<0,001 in all results.
Table Legend:
Spearman’s correlation coefficients between the MMQL-AF and PedsQL 4.0 SF subscales to assess concurrent validity.
Strong correlations were found between corresponding domains (r = 0.76–0.85, p < 0.001), including physical, emotional/psychological, social, and cognitive/school functioning.
Additionally, intimate relations strongly correlated with social functioning, while body image and outlook on life showed moderate associations with related PedsQL domains.
