# Supplementary material for: Quality of Life among Hungarian Adolescents with Cancer: The Hungarian Adaptation of the Minneapolis-Manchester Quality of Life Instrument - Adolescent Form (MMQL-AF)
Source: Research Square preprint supplement (doi:10.21203/rs.3.rs-7593854/v1), 2025-09-29
Supplement: Supplementary file 7 [file db0750293241eef037917eed.xlsx]

## Sheet: Table_2_Cronbachs alpha coeffic
	Cronbach's alpha coefficient	CI (95%)
Total score	0.92	0.86, 0.94
Physical funcioning	0.76	0.71, 0.81
Psychological functioning	0.82	0.77, 0.86
Social functioning	0.80	0.75, 0.84
Cognitive functioning	0.90	0.87, 0.92
Body Image	0.73	0.65, 0.79
Outlook on life	0.87	0.82, 0.91
Intimate relations	0.75	0.65, 0.82
Supplementary material 1 - Cronbach’s alpha coefficient for the Hungarian version of the MMQL-AF questionnaire with 95% confidence intervals
Table Legend:
Internal consistency of the Hungarian MMQL-AF assessed using Cronbach’s alpha for each domain.
The overall questionnaire demonstrated excellent reliability (α = 0.92), with individual domains showing acceptable to excellent internal consistency (α ranging from 0.72 to 0.90), supporting the scale’s structural validity.
